# Supplementary material for: Carriers of Parkinson’s disease-linked SNCA Rep1 variant have greater non-motor decline: a 4 year follow up study
Source: publisher site journal article supplement (doi:10.18632/aging.206196), 2025-02-03
Supplement: Supplementary file [file aging-vnull-206196-supplementary-material-SD1.pdf]

**SUPPLEMENTARY FIGURE**

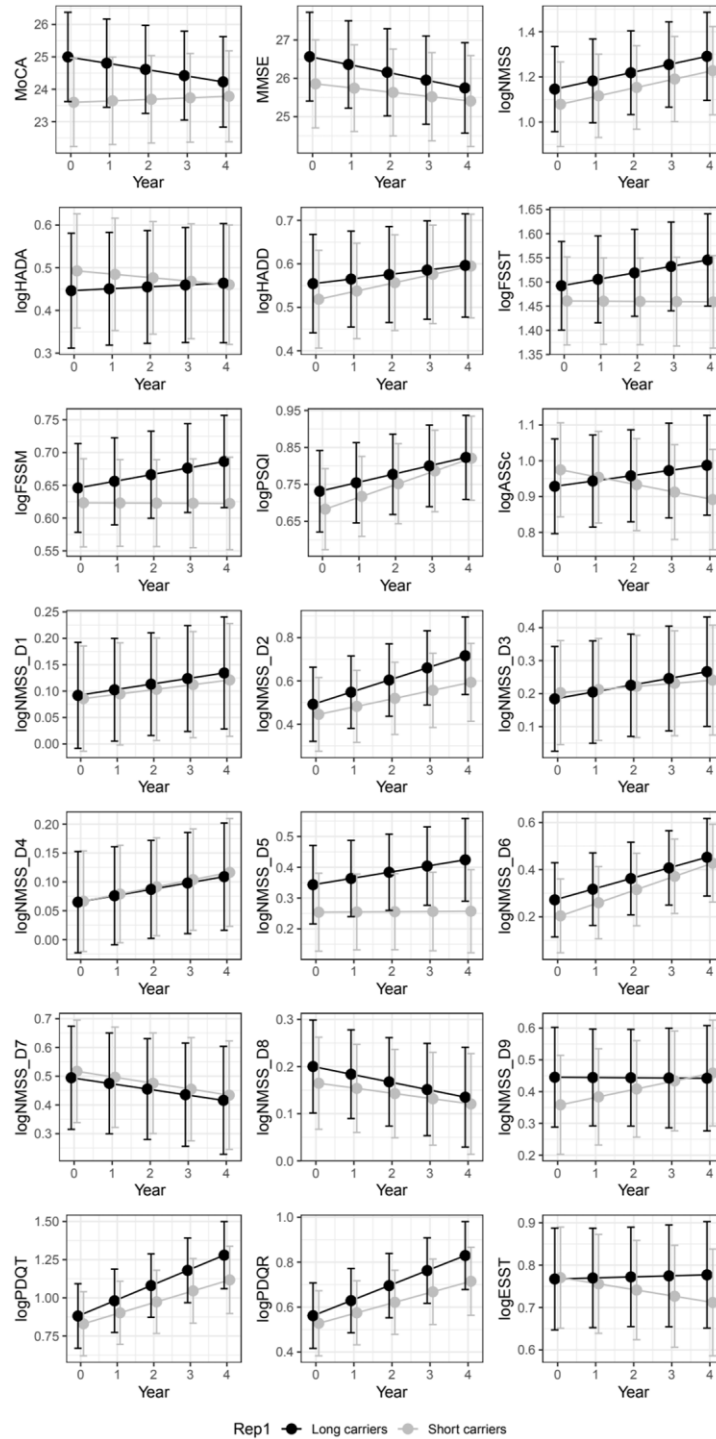

**Supplementary Figure 1. Associations between SNCA Rep1 allele length and non-motor symptoms (including global cognition) in early PD patients over time.** Results are generated using linear mixed model analysis, controlling for age, gender, disease duration, *APOE4* status, baseline H&Y status (for MMSE and MoCA scores) and baseline MoCA scores (for all other non-motor functions).
